# Supplementary material
Source: publisher site journal article supplement (https://www.spandidos-publications.com/5524/downloadSupplementary)
Supplement: Supplementary file 1 [file downloadSupplementary]

## Sheet: tissue samples
List the information of total patients including serum samples and tissues samples.
Tissue sample	Gender	Age (years)	Diagnosis	TNM Stage
PN2	Female	54	Paracancerous tissues
PT2	Female	54	Adenocarcinoma	T1bN0M0	Stage IA
PN3	Male	65	Paracancerous tissues
PT3	Male	65	Adenocarcinoma	T1cN0M0	Stage IA
PN4	Female	69	Paracancerous tissues
PT4	Female	69	Adenocarcinoma	T1cN0M0	Stage IA

## Sheet: serum samples
Table SI. List the information of total patients including serum samples and tissues samples.
No.	Sample	SERPINA3 expression	Gender	Age (Year)	Diagnosis	TNM	Stage
1	Benign	1.39693	Female	67	other
2	Benign	0.946874	Male	53	IPP
3	Benign	1.32026	Female	53	AAH
4	Benign	1.13411	Female	71	other
5	Benign	1.30667	Female	75	other
6	Benign	0.590721	Male	56	IPP
7	Benign	0.960005	Male	86	PH
8	Benign	1.05286	Male	26	IPP
9	Benign	1.6133	Female	56	PTB
10	Benign	1.12909	Male	32	other
11	Benign	1.82282	Male	57	PTB
12	Benign	2.72462	Female	25	AAH
13	Benign	1.25365	Female	56	PTB
14	Benign	0.897445	Male	62	PTB
15	Benign	1.3094	Male	50	PH
16	Benign	2.12495	Female	51	IPP
17	Benign	1.46329	Female	48	PTB
18	Benign	1.27143	Female	54	AAH
19	Benign	2.30073	Female	75	other
20	Benign	3.51156	Male	61	PTB
21	Benign	4.67393	Male	51	IPP
22	Benign	3.40756	Male	75	PTB
23	Benign	2.57665	Female	53	IPP
24	Benign	2.39192	Female	46	AAH
25	Benign	2.77557	Male	46	other
26	Benign	2.60742	Male	41	other
27	Benign	2.40825	Female	54	other
28	Benign	1.61406	Female	58	IPP
29	Benign	2.50578	Male	68	IPP
30	Benign	1.90647	Female	43	IPP
31	Benign	2.30053	Female	33	other
32	Benign	2.10425	Male	54	PTB
33	Benign	2.08797	Male	63	IPP
34	Benign	2.52971	Female	34	IPP
35	Benign	1.13858	Female	43	IPP
36	Benign	2.45816	Female	54	IPP
37	Benign	2.21181	Female	69	PTB
38	Benign	2.05777	Male	61	other
39	Benign	2.37213	Female	41	other
40	Benign	0.41652	Male	46	IPP
41	Benign	1.54331	Male	58	IPP
42	Benign	0.833851	Male	57	IPP
43	Benign	1.0089	Female	40	IPP
44	Benign	1.47824	Male	55	IPP
45	Benign	0.973738	Female	56	AAH
46	Benign	1.53149	Male	79	AAH
47	Benign	1.42097	Male	67	IPP
48	Benign	1.38987	Male	47	IPP
49	Benign	1.27326	Female	68	PH
50	Benign	1.0704	Female	45	PTB
51	Benign	1.93417	Male	42	IPP
52	Benign	1.40345	Male	49	other
53	Benign	2.19748	Female	57	IPP
54	Benign	2.29055	Female	60	IPP
55	Benign	5.73772	Female	60	IPP
56	Benign	5.57859	Female	50	PH
57	Benign	2.5123	Male	27	PTB
58	Benign	2.01926	Female	46	IPP
59	Benign	0.899441	Male	37	other
60	Benign	1.73193	Male	74	PTB
61	Benign	2.24591	Female	67	IPP
62	Benign	1.80007	Male	57	PH
63	Benign	1.58865	Male	56	IPP
64	Benign	2.58474	Female	71	IPP
1	Patient	1.08925	Female	54	AD	T1aN0M0	ⅠA1
2	Patient	1.17704	Female	72	AD	T1bN0M0	ⅠA2
3	Patient	0.530865	Female	52	AD	T1aN0M0	ⅠA1
4	Patient	1.07384	Female	45	AD	T1aN0M0	ⅠA1
5	Patient	0.654385	Female	51	AD	TisN0M0	Tis
6	Patient	1.01717	Female	67	AD	T1aN0M0	ⅠA1
7	Patient	1.07951	Male	60	AD	T1bN0M0	ⅠA2
8	Patient	0.839451	Female	32	AD	T1aN0M0	ⅠA1
9	Patient	0.271027	Male	65	AD	T1aN0M0	ⅠA1
10	Patient	0.732368	Male	66	AD	T1bN0M0	ⅠA2
11	Patient	0.644538	Female	44	AD	T1bN0M0	ⅠA2
12	Patient	0.700066	Male	64	AD	T1bN0M0	ⅠA2
13	Patient	0.402186	Male	58	AD	T1aN0M0	ⅠA1
14	Patient	0.490327	Female	64	AD	TisN0M0	Tis
15	Patient	0.79609	Female	38	AD	T1bN0M0	ⅠA2
16	Patient	0.535056	Female	68	AD	T1bN0M0	ⅠA2
17	Patient	0.670586	Female	67	AD	T1cN0M0	ⅠA3
18	Patient	1.1125	Male	52	SCC	T3N0M0	ⅡB
19	Patient	1.13824	Female	71		T1aN2M0	ⅢA
20	Patient	0.962123	Female	54	Tis	TisN0M0	Tis
21	Patient	1.31531	Female	44	Tis	T1aN0M0	ⅠA1
22	Patient	0.490573	Female	74	AD	TisN0M0	Tis
23	Patient	0.858108	Female	41	AD	TisN0M0	Tis
24	Patient	1.49745	Female	32	Tis	TisN0M0	Tis
25	Patient	1.28008	Female	45	AD	TisN0M0	Tis
26	Patient	0.558442	Male	50	AD	T1aN0M0	ⅠA1
27	Patient	0.336878	Male	65	AD	T1aN0M0	ⅠA1
28	Patient	0.549116	Female	33	AD	T1aN0M0	ⅠA1
29	Patient	0.269245	Male	55	AD	T1aN0M0	ⅠA1
30	Patient	0.295737	Female	28	AD	T1aN0M0	ⅠA1
31	Patient	0.791884	Male	59	AD	T1cN2M0	ⅢA
32	Patient	0.671818	Male	59	AD	T1cN0M0	ⅠA3
33	Patient	0.902457	Female	55	AD	T1cN0M0	ⅠA3
34	Patient	0.437964	Female	54	AD	T1cN0M0	ⅠA3
35	Patient	0.595095	Male	55	AD	T1bN0M0	ⅠA2
36	Patient	0.167608	Female	54	AD	T1cN0M0	ⅠA3
37	Patient	0.0172	Male	75	SCC	T1bN0M0	ⅠA2
38	Patient	1.14187	Female	69	Tis	TisN0M0	Tis
39	Patient	1.07648	Female	57	AD	T1aN0M0	ⅠA1
40	Patient	1.42875	Female	35	AD	T1aN0M0	ⅠA1
41	Patient	1.57816	Male	77	AD	T1aN0M0	ⅠA1
42	Patient	0.802692	Female	30	AD	T1aN0M0	ⅠA1
43	Patient	0.191349	Male	77	AD	T1cN2M0	ⅢA
44	Patient	0.944561	Female	18	Tis	TisN0M0	Tis
45	Patient	1.26382	Female	28	Tis	TisN0M0	Tis
46	Patient	0.654586	Female	56	AD	TisN0M0	Tis
47	Patient	1.18171	Male	52	AD	TisN0M0	Tis
48	Patient	1.93103	Female	53	AD	T1aN0M0	ⅠA1
49	Patient	1.52851	Male	19	AD	TisN0M0	Tis
50	Patient	1.3252	Female	56	AD	T1bN0M0	ⅠA2
51	Patient	1.64065	Male	66	AD	T1bN0M0	ⅠA2
52	Patient	1.00333	Male	66	AD	T1aN0M0	ⅠA1
53	Patient	1.70448	Male	80	AD	T1aN0M0	ⅠA1
54	Patient	1.69442	Male	64	SCC	T1cN0M0	ⅠA3
55	Patient	0.383144	Female	75	AD	T1aN1M0	IIB
56	Patient	1.7581	Male	71	AD	T1aN1M0	IIB
57	Patient	1.59011	Female	25	AD	T1aN0M0	ⅠA1
58	Patient	2.06478	Female	33	AD	T1aN0M0	ⅠA1
59	Patient	0.675229	Male	35	AD	T1aN0M0	ⅠA1
60	Patient	1.07722	Female	54	AD	T1aN0M0	ⅠA1
61	Patient	1.65472	Female	67	AD	T1aN0M0	ⅠA1
62	Patient	1.51802	Female	69	AD	T1aN0M0	ⅠA1
63	Patient	1.62694	Male	49	AD	T1aN0M0	ⅠA1
64	Patient	1.20822	Male	56	AD	T1aN0M0	ⅠA1
65	Patient	0.356219	Female	60	AD	T1aN0M0	ⅠA1
66	Patient	1.63674	Female	50	AD	T1bN0M0	ⅠA2
67	Patient	1.50142	Female	66	AD	T1bN0M0	ⅠA2
68	Patient	0.723794	Male	68	AD	T1cN0M0	ⅠA3
69	Patient	1.2936	Female	52	AD	T1aN0M0	ⅠA1
70	Patient	0.959218	Female	50	AD	TisN0M0	Tis
71	Patient	1.24742	Male	57	AD	T1aN0M0	ⅠA1
72	Patient	1.48331	Female	39	AD	T1aN0M0	ⅠA1
73	Patient	1.36898	Female	62	AD	TisN0M0	Tis
74	Patient	1.46903	Male	65	AD	T1aN0M0	ⅠA1
75	Patient	1.31092	Female	64	AD	TisN0M0	Tis
76	Patient	1.57057	Male	51	SCC	T2bN0M0	IIA
77	Patient	1.32019	Male	65	AD	T1bN0M0	ⅠA2
78	Patient	1.58605	Male	70	AD	T2bN0M0	IIA
79	Patient	1.58667	Female	53	AD	TisN0M0	Tis
80	Patient	1.29487	Female	36	AD	T1aN0M0	ⅠA1
81	Patient	1.59717	Male	72	AD	T1aN0M0	ⅠA1
82	Patient	1.29566	Female	74	AD	T1bN0M0	ⅠA2
83	Patient	1.68567	Male	56	AD	TisN0M0	Tis
84	Patient	1.97122	Female	68	AD	T1bN0M0	ⅠA2
85	Patient	1.59486	Female	55	AD	TisN0M0	Tis
86	Patient	0.78144	Male	61	AD	T1aN0M0	ⅠA1
87	Patient	1.60813	Female	49	AD	TisN0M0	Tis
88	Patient	1.25859	Female	34	AD	T1aN0M0	ⅠA1
89	Patient	1.21705	Female	65	AD	T1bN0M0	ⅠA2
90	Patient	0.776492	Female	60	AD	TisN0M0	Tis
91	Patient	1.28647	Male	75	SCC	T1bN0M0	ⅠA2
92	Patient	0.810337	Male	68	AD	T1aN0M0	ⅠA1
93	Patient	0.887565	Male	66	AD	T1bN0M0	ⅠA2
94	Patient	1.00891	Female	65	AD	T1bN0M0	ⅠA2
95	Patient	1.14543	Female	57	AD	T1aN0M0	ⅠA1
96	Patient	0.934305	Female	38	AD	TisN0M0	Tis
97	Patient	0.953701	Female	57	AD	T1aN0M0	ⅠA1
98	Patient	1.50593	Male	80	AD	T1cN0M0	ⅠA3
99	Patient	1.35741	Female	42	AD	T1aN0M0	ⅠA1
100	Patient	0.824854	Male	58	AD	T1aN0M0	ⅠA1
101	Patient	1.30253	Female	65		T1aN0M0	ⅠA1
102	Patient	0.960776	Female	61	AD	T1aN0M0	ⅠA1
103	Patient	0.760612	Male	30	AD	T1aN0M0	ⅠA1
104	Patient	1.06944	Male	67	AD	T1cN1M0	ⅡB
105	Patient	0.729331	Female	57	AD	T1aN0M0	ⅠA1
106	Patient	0.658228	Female	42	AD	T1aN0M0	ⅠA1
107	Patient	0.782509	Female	62	AD	TisN0M0	Tis
108	Patient	0.506273	Female	72	AD	T1aN0M0	ⅠA1
109	Patient	0.769052	Female	58	AD	TisN0M0	Tis
110	Patient	0.664919	Male	54		T1bN0M0	ⅠA2
111	Patient	0.731054	Female	63	AD	T1aN0M0	ⅠA1
112	Patient	0.63843	Female	64	AD	T1bN0M0	ⅠA2
113	Patient	0.868442	Female	39	AD	TisN0M0	Tis
114	Patient	0.88452	Female	51	AD	T1aN0M0	ⅠA1
115	Patient	0.763633	Female	50	AD	T1aN0M0	ⅠA1
116	Patient	0.661909	Male	52	AD	T1bN0M0	ⅠA2
117	Patient	0.829645	Female	33	AD	T1aN0M0	ⅠA1
118	Patient	1.10237	Female	28	AD	T1aN0M0	ⅠA1
119	Patient	0.76349	Male	40	AD	T1aN0M0	ⅠA1
120	Patient	0.575661	Male	59	AD	T1aN0M0	ⅠA1
121	Patient	0.614452	Female	63	AD	T1bN0M0	ⅠA2
122	Patient	0.476465	Female	31	AD	T1cN2M0	ⅢA
123	Patient	0.932327	Female	49	AD	T1cN0M0	ⅠA3
124	Patient	0.718113	Female	57	AD	T1bN0M0	ⅠA2
125	Patient	0.495075	Male	65	AD	TisN0M0	Tis
126	Patient	0.755074	Female	52	AD	T1aN0M0	ⅠA1
127	Patient	0.873534	Female	51	AD	TisN0M0	Tis
128	Patient	0.626575	Male	50	AD	TisN0M0	Tis
129	Patient	0.928589	Male	69	AD	T1aN0M0	ⅠA1
130	Patient	0.600009	Female	71	AD	T1cN1M0	ⅡB
131	Patient	0.900022	Male	55		T1bN0M0	IA 2
132	Patient	0.955233	Female	46	AD	TisN0M0	Tis
133	Patient	0.815571	Male	77	SCC	T3N1M0	IIIA
134	Patient	0.986006	Female	68	AD	T1aN0M0	ⅠA1
135	Patient	0.590504	Male	69		T1bN0M0	ⅠA2
136	Patient	0.514941	Male	62	AD	T1bN0M0	ⅠA2
137	Patient	0.550543	Female	72	AD	TisN0M0	Tis
138	Patient	0.822279	Female	62	AD	T1bN0M0	ⅠA2
139	Patient	0.620166	Female	64	AD	T1bN0M0	ⅠA2
140	Patient	1.14495	Female	57	AD	T1aN0M0	ⅠA1
141	Patient	1.10168	Female	62	AD	T1aN0M0	ⅠA1
142	Patient	0.700123	Male	51	AD	T1cN0M0	ⅠA3
143	Patient	0.637961	Male	60	AD	T1bN0M0	ⅠA2
144	Patient	1.35991	Male	77	AD	T2aN0M0	IB
145	Patient	1.75908	Female	62	AD	T1bN0M0	ⅠA2
146	Patient	2.91587	Female	34	AD	T1aN0M0	ⅠA1
147	Patient	1.91135	Female	56	AD	TisN0M0	Tis
148	Patient	0.90571	Female	61	AD	T1aN0M0	ⅠA1
149	Patient	1.2696	Male	60	AD	T3N0M0	ⅡB
150	Patient	1.1838	Female	55	AD	T1aN0M0	ⅠA1
151	Patient	2.09693	Male	49	AD	T1aN0M0	ⅠA1
152	Patient	4.79655	Female	38	AD	T1aN0M0	ⅠA1
153	Patient	1.66092	Female	49	AD	T1aN0M0	ⅠA1
154	Patient	1.02757	Female	60	AD	T1aN0M0	ⅠA1
155	Patient	2.25672	Female	50	AD	TisN0M0	Tis
156	Patient	1.54409	Female	35	AD	T1aN0M0	ⅠA1
157	Patient	0.354238	Female	31	AD	TisN0M0	Tis
158	Patient	3.95537	Male	66	AD	T1bN0M0	ⅠA2
159	Patient	0.943041	Male	78	SCC	T1cN0M0	ⅠA3
160	Patient	2.38051	Female	49	AD	TisN0M0	Tis
161	Patient	0.625978	Male	67	AD	T1bN0M0	ⅠA2
162	Patient	0.603478	Female	48	AD	TisN0M0	Tis
163	Patient	0.938381	Male	59	AD	T1bN0M0	ⅠA2
164	Patient	1.07414	Male	66	AD	T1bN0M0	ⅠA2
165	Patient	1.42302	Male	62	AD	T1aN0M0	ⅠA1
166	Patient	0.660787	Female	75	AD	T1aN0M0	ⅠA1
167	Patient	2.25427	Male	59	AD	T1aN0M0	ⅠA1
168	Patient	0.946547	Female	34	AD	TisN0M0	Tis
169	Patient	0.862736	Male	58	AD	TisN0M0	Tis
170	Patient	1.91698	Male	53	AD	TisN0M0	Tis
171	Patient	0.133277	Male	72	AD	T1cN1M0	ⅡB
172	Patient	1.26478	Male	70	AD	T1bN0M0	ⅠA2
173	Patient	0.860003	Male	62	AD	T1bN0M0	ⅠA2
174	Patient	1.4662	Male	67	AD	TisN0M0	Tis
175	Patient	1.29455	Male	66	AD	T1bN0M0	ⅠA2
176	Patient	0.929066	Male	38	AD	T1bN0M0	ⅠA2
177	Patient	1.18406	Male	59	AD	T1aN0M0	ⅠA1
178	Patient	0.787121	Female	63	AD	T1aN0M0	ⅠA1
179	Patient	1.94291	Female	62	AD	T1bN0M0	ⅠA2
